# Supplementary material
Source: PubMed Central journal article supplement (PMC356960)

**ECAXp**

**FISH**

**ECAXp RH**

**HSAXp**  
Mbps

**MMUX**  
Mbps

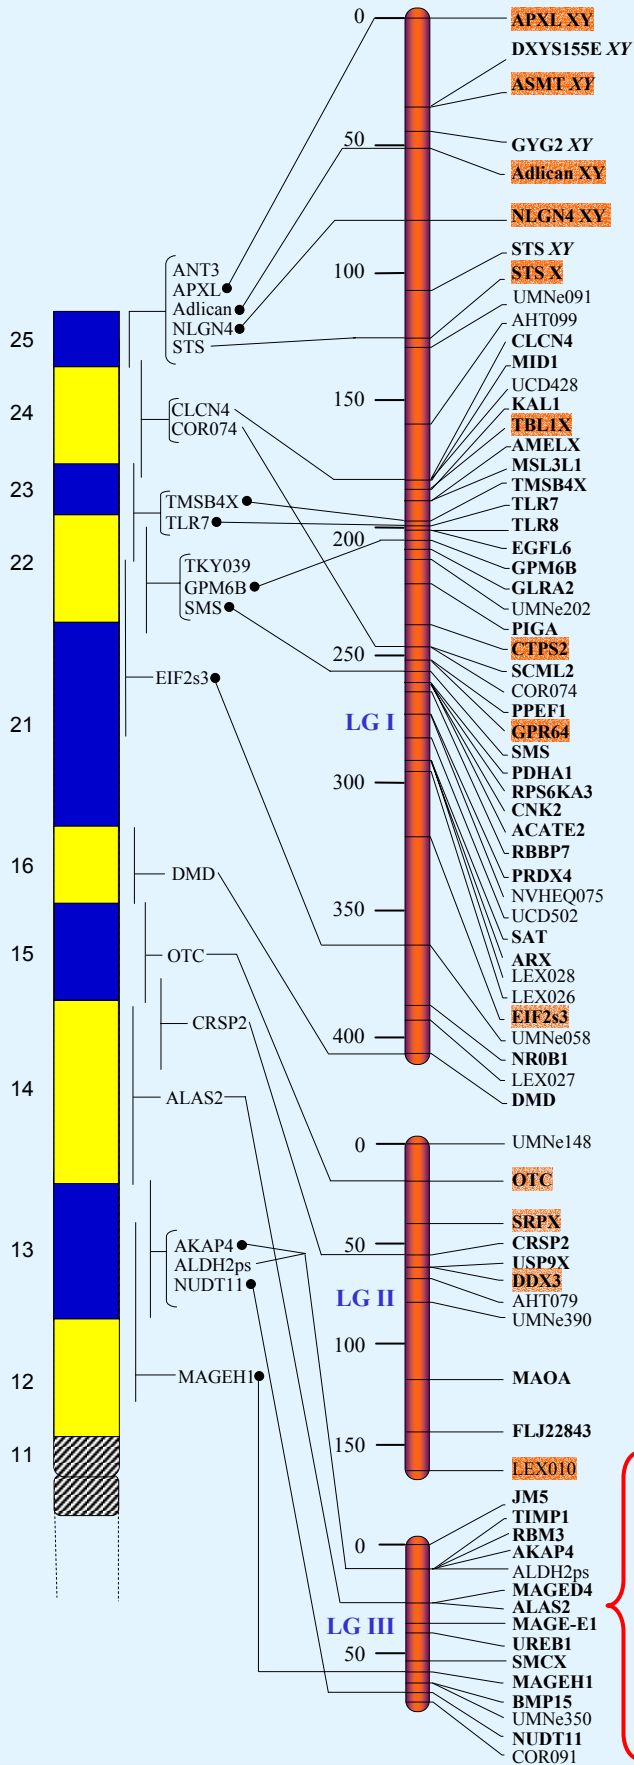

|      |          |       |
|------|----------|-------|
| 9.1  | APXL     | 140.9 |
| 1.1  | ANT3     | --    |
| 1.3  | DXYS155E | --    |
| 1.3  | ASMT     | --    |
| 2.3  | GYG2     | --    |
| 2.8  | Adlican  | --    |
| 5.2  | NLGN4    | 84.1  |
| 6.5  | STS      | --    |
| 9.5  | CLCN4    | MMU7  |
| 9.8  | MID1     | 157.8 |
| 7.9  | KAL1     | --    |
| 8.8  | TBL1X    | 67.2  |
| 10.6 | AMELX    | 157.3 |
| 11.1 | MSL3L1   | 156.7 |
| 12.3 | TMSB4X   | 155.2 |
| 12.2 | TLR7     | 155.3 |
| 12.2 | TLR8     | 155.2 |
| 12.9 | EGFL6    | 154.5 |
| 13.1 | GPM6B    | 154.3 |
| 13.9 | GLRA2    | 153.1 |
| 14.6 | PIGA     | 152.4 |
| 15.9 | CTPS2    | 150.9 |
| 17.6 | SCML2    | 149.1 |
| 18.0 | PPEF1    | 148.6 |
| 18.3 | GPR64    | 148.4 |
| 21.3 | SMS      | 145.4 |
| 18.7 | PDHA1    | 148.1 |
| 19.5 | RPS6KA3  | 147.2 |
| 20.7 | CNK2     | 145.8 |
| 23.0 | ACATE2   | 143.2 |
| 16.2 | RBBP7    | 150.8 |
| 23.0 | PRDX4    | 143.3 |
| 23.1 | SAT      | 143.2 |
| 24.3 | ARX      | 83.0  |
| 23.4 | EIF2s3   | 83.9  |
| 29.6 | NR0B1    | 75.9  |
| 30.4 | DMD      | 74.8  |
| 37.2 | OTC      | 8.8   |
| 37.0 | SRPX     | 8.5   |
| 39.5 | CRSP2    | 11.2  |
| 40.0 | USP9X    | 11.7  |
| 40.2 | DDX3     | 11.8  |
| 42.6 | MAOA     | 15.1  |
| 43.0 | FLJ22843 | 15.6  |
| 47.4 | MG61     | 6.7   |
| 47.9 | JMS      | 6.2   |
| 46.4 | TIMP1    | 19.4  |
| 47.4 | RBM3     | 6.7   |
| 48.8 | AKAP4    | 5.6   |
| 50.7 | MAGED4   | 138.5 |
| 54.0 | ALAS2    | 138.2 |
| 50.7 | MAGE-E1  | 95.0  |
| 52.5 | UREB1    | 139.6 |
| 52.1 | SMCX     | 139.9 |
| 54.4 | MAGEH1   | 141.3 |
| 49.5 | BMP15    | 4.9   |
| 50.1 | NUDT11   | 4.8   |

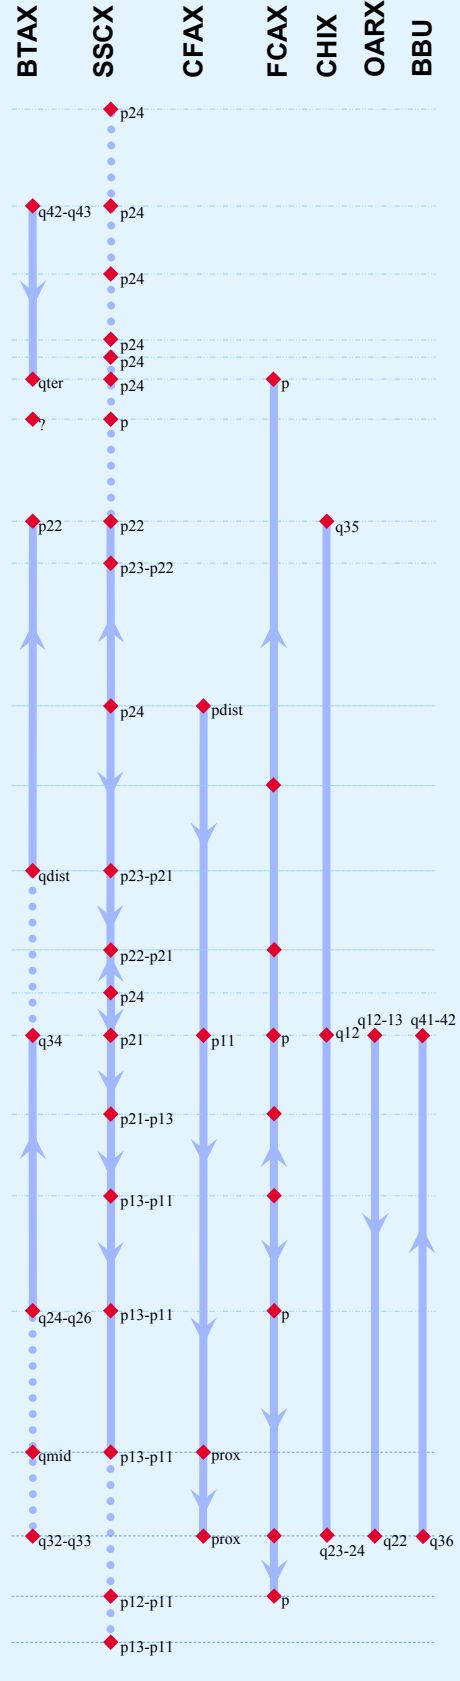

centromere

**ECAXq**

**FISH**

**ECAXq RH**

**HSAXq**

**MMUX**

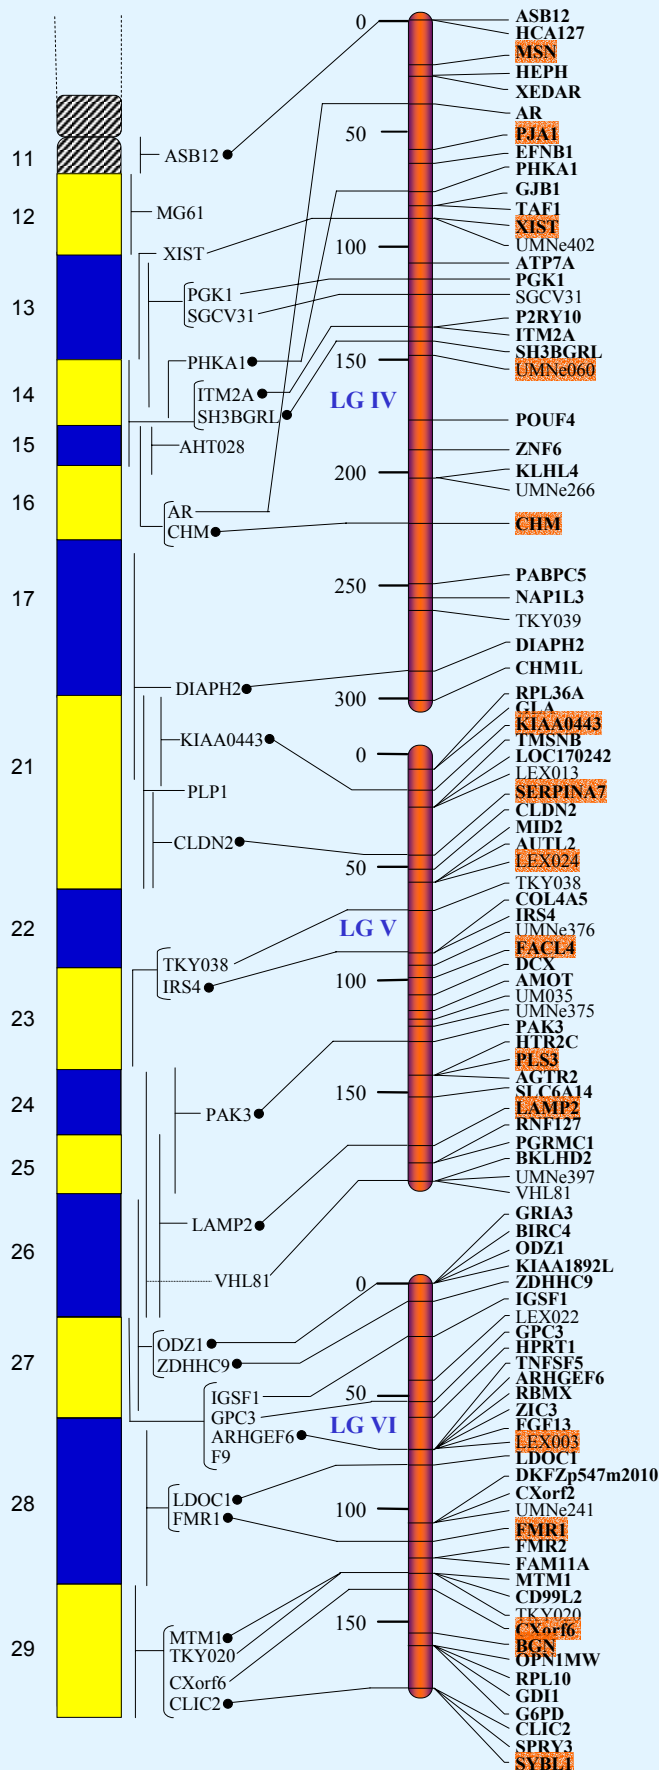

| HSAXq |               | MMUX  |             |
|-------|---------------|-------|-------------|
| Mbps  |               | Mbps  |             |
| 62.3  | ASB12         | 85.1  | ASB12       |
| 63.0  | HCA127        | 85.3  | HCA127      |
| 63.7  | MSN           | 85.8  | MSN         |
| 64.2  | HEPH          | 86.1  | HEPH        |
| 64.6  | XEDAR         | 87.1  | XEDAR       |
| 65.6  | AR            | 87.9  | AR          |
| 67.2  | PIA1          | 89.3  | PIA1        |
| 66.9  | EFNB1         | 88.9  | EFNB1       |
| 70.6  | PHKA1         | 92.4  | PHKA1       |
| 69.3  | GJB1          | 91.2  | GJB1        |
| 69.4  | TAF1          | 91.4  | TAF1        |
| 71.9  | XIST          | 93.3  | XIST        |
| 75.9  | ATP7A         | 95.9  | ATP7A       |
| 76.1  | PGK1          | 96.0  | PGK1        |
| 76.9  | P2RY10        | 97.0  | P2RY10      |
| 77.3  | ITM2A         | 97.3  | ITM2A       |
| 79.2  | SH3BGRL       | 99.0  | SH3BGRL     |
| 81.5  | POUF4         | 100.8 | POUF4       |
| 83.2  | ZNF6          | 102.3 | ZNF6        |
| 85.5  | KLHL4         | 104.2 | KLHL4       |
| 83.8  | CHM           | 102.8 | CHM         |
| 89.4  | PABPC5        | 109.6 | PABPC5      |
| 91.6  | NAP1L3        | 112.0 | NAP1L3      |
| 94.7  | DIAPH2        | 118.1 | DIAPH2      |
| 98.6  | CHM1L         | 122.3 | CHM1L       |
| 99.4  | RPL36A        | --    | RPL36A      |
| 99.4  | GLA           | 123.0 | GLA         |
| 100.6 | KIAA0443      | 124.3 | KIAA0443    |
| 100.5 | TMSNB         | --    | TMSNB       |
| 101.8 | PLP1          | 118.6 | PLP1        |
| 101.9 | LOC170242     | --    | LOC170242   |
| 104.0 | SERPINA7      | --    | SERPINA7    |
| 104.9 | CLDN2         | 128.1 | CLDN2       |
| 105.8 | MID2          | 129.1 | MID2        |
| 106.1 | AUTL2         | 129.3 | AUTL2       |
| 106.5 | COL4A5        | 129.7 | COL4A5      |
| 106.7 | IRS4          | 129.9 | IRS4        |
| 107.6 | FACL4         | 130.5 | FACL4       |
| 109.3 | DCX           | 132.1 | DCX         |
| 110.7 | AMOT          | 133.7 | AMOT        |
| 109.1 | PAK3          | 131.7 | PAK3        |
| 112.5 | HTR2C         | 135.4 | HTR2C       |
| 113.6 | PLS3          | 65.5  | PLS3        |
| 114.0 | AGTR2         | 20.0  | AGTR2       |
| 114.3 | SLC6A14       | 20.2  | SLC6A14     |
| 118.3 | LAMP2         | 29.5  | LAMP2       |
| 116.8 | RNF127        | 27.6  | RNF127      |
| 117.1 | PGRMC1        | 27.9  | PGRMC1      |
| 115.7 | BKLHD2        | 21.8  | BKLHD2      |
| 121.0 | GRIA3         | 32.7  | GRIA3       |
| 121.7 | BIRC4         | 33.4  | BIRC4       |
| 122.2 | ODZ1          | 33.8  | ODZ1        |
| 124.3 | KIAA1892L     | 36.1  | KIAA1892L   |
| 127.6 | ZDHC9         | 39.4  | ZDHC9       |
| 129.1 | IGSF1         | 41.1  | IGSF1       |
| 131.3 | GPC3          | 43.5  | GPC3        |
| 132.2 | HPRT1         | --    | HPRT1       |
| 134.4 | TNFSF5        | 46.8  | TNFSF5      |
| 134.4 | ARHGEF6       | 46.8  | ARHGEF6     |
| 134.6 | RBMX          | 47.0  | RBMX        |
| 135.3 | ZIC3          | 47.6  | ZIC3        |
| 136.6 | FGF13         | 48.7  | FGF13       |
| 137.3 | F9            | 49.6  | F9          |
| 138.9 | LDOC1         | --    | LDOC1       |
| 141.4 | DKFZp547m2010 | --    | DKFZp547... |
| 143.5 | CXorf2        | --    | CXorf2      |
| 145.6 | FMR1          | 58.2  | FMR1        |
| 146.2 | FMR2          | 59.2  | FMR2        |
| 147.3 | FAM11A        | 60.0  | FAM11A      |
| 148.4 | MTM1          | 60.8  | MTM1        |
| 148.5 | CD99L2        | 61.0  | CD99L2      |
| 148.2 | CXorf6        | --    | CXorf6      |
| 151.2 | BGN           | 63.0  | BGN         |
| 151.9 | OPN1MW        | 63.7  | OPN1MW      |
| 152.0 | RPL10         | 63.8  | RPL10       |
| 152.1 | GDI1          | 63.9  | GDI1        |
| 152.2 | G6PD          | 64.0  | G6PD        |
| 152.9 | CLIC2         | --    | CLIC2       |
| 153.4 | SPRY3         | --    | SPRY3       |
| 153.5 | SYBL1         | ~75.1 | SYBL1       |

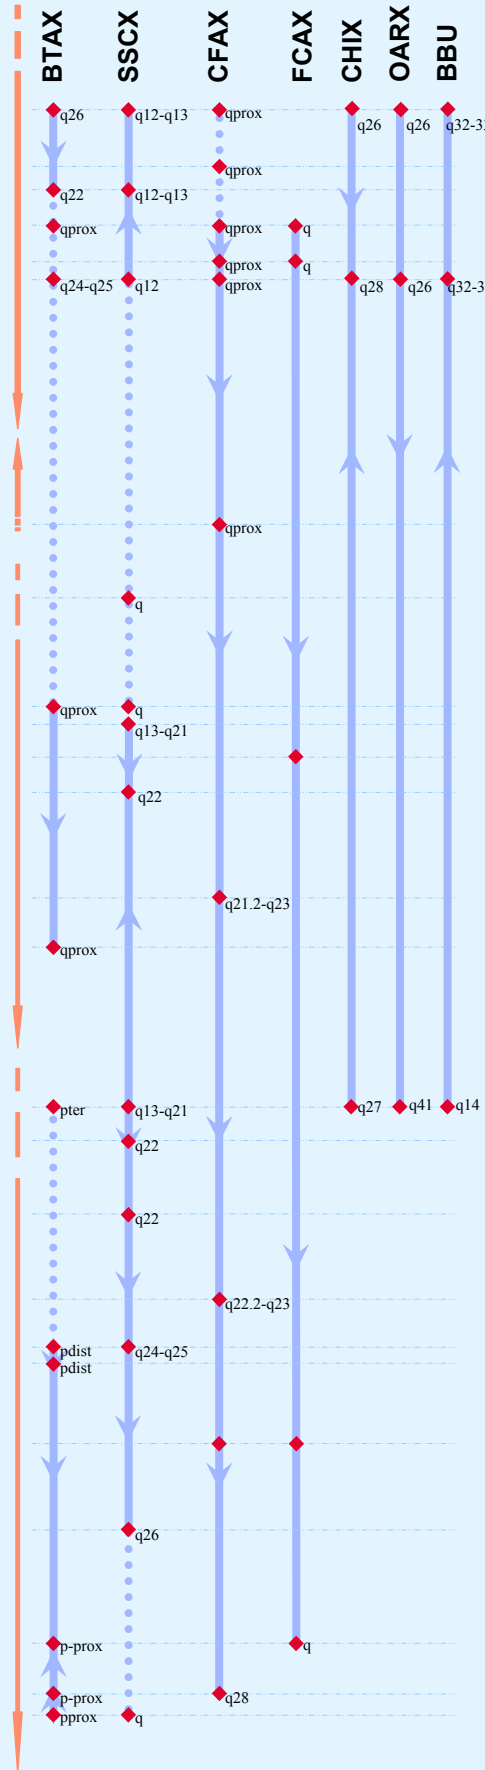

Supplement: pnas_0308513100_6.pdf [file pnas_0308513100_6.pdf]
